# Supplementary material for: Multiplex immune profiling reveals the role of serum immune proteomics in predicting response to preoperative chemotherapy of gastric cancer
Source: PubMed Central journal article supplement — Cell Rep Med. 2023 Jan 31;4(2):100931. doi: 10.1016/j.xcrm.2023.100931 (PMC9975277; doi:10.1016/j.xcrm.2023.100931), 2023-01-31
Supplement: mmc1.pdf [file mmc1.pdf]

**Cell Reports Medicine, Volume 4**

**Supplemental information**

**Multiplex immune profiling reveals the role of  
serum immune proteomics in predicting response  
to preoperative chemotherapy of gastric cancer**

**Zhaoqing Tang, Yuan Gu, Zhongyi Shi, Lingqiang Min, Ziwei Zhang, Peng Zhou, Rongkui Luo, Yan Wang, Yuehong Cui, Yihong Sun, and Xuefei Wang**

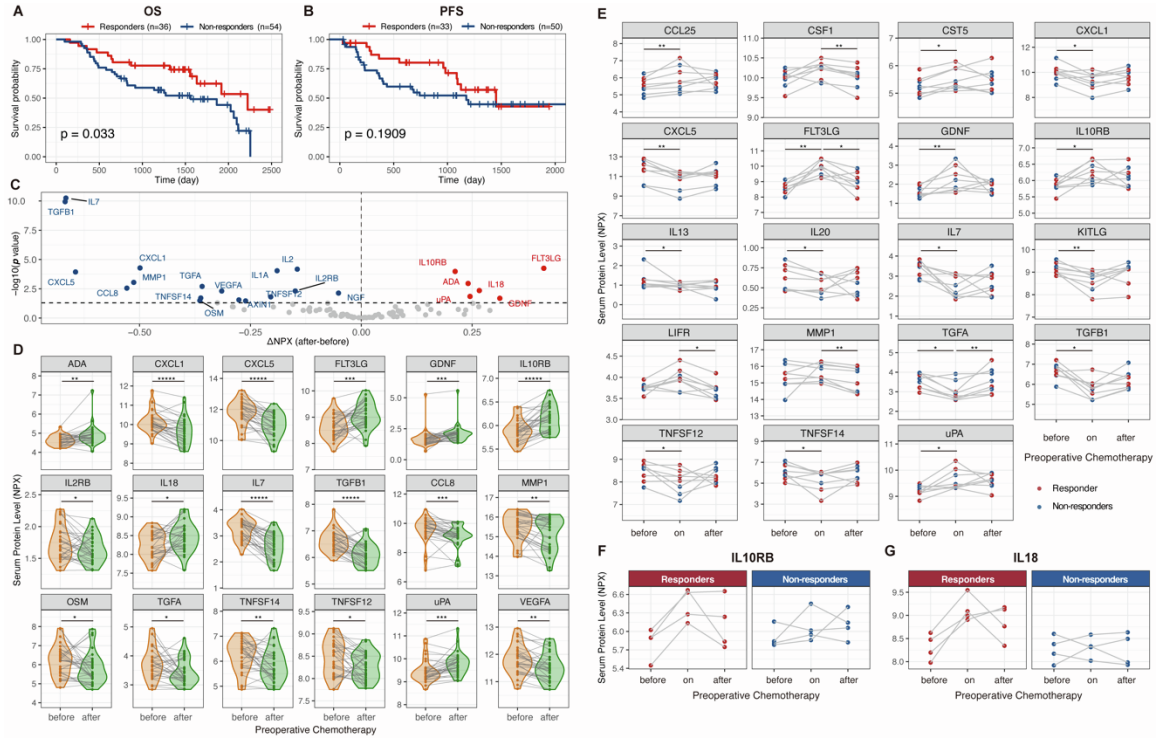

**Figure S1. Dynamics of serum immune proteomics during and after preoperative chemotherapy, related to Figure 1.** (A). Kaplan–Meier curves of overall survival (OS) for patients with different treatment responses. Log-rank test showed  $p=0.033$ . (B) Kaplan–Meier curves of progression-free survival (PFS) for patients with different treatment responses. Log-rank test showed  $p=0.1909$ . (C) Volcano plot showed serum proteins whose levels changed after preoperative chemotherapy in unpaired tests (before  $n=37$ , after  $n=83$ ). (D) The dynamics of the serum proteins showing a significant change after preoperative chemotherapy in both paired and unpaired tests. Only paired serum samples were shown. (E) Dynamics of serum proteins showing a significant change during preoperative chemotherapy. (F) Dynamics of serum IL10RB level during preoperative chemotherapy in responders and non-responders. (G) Dynamics of serum IL18 level during preoperative chemotherapy in responders and non-responders.

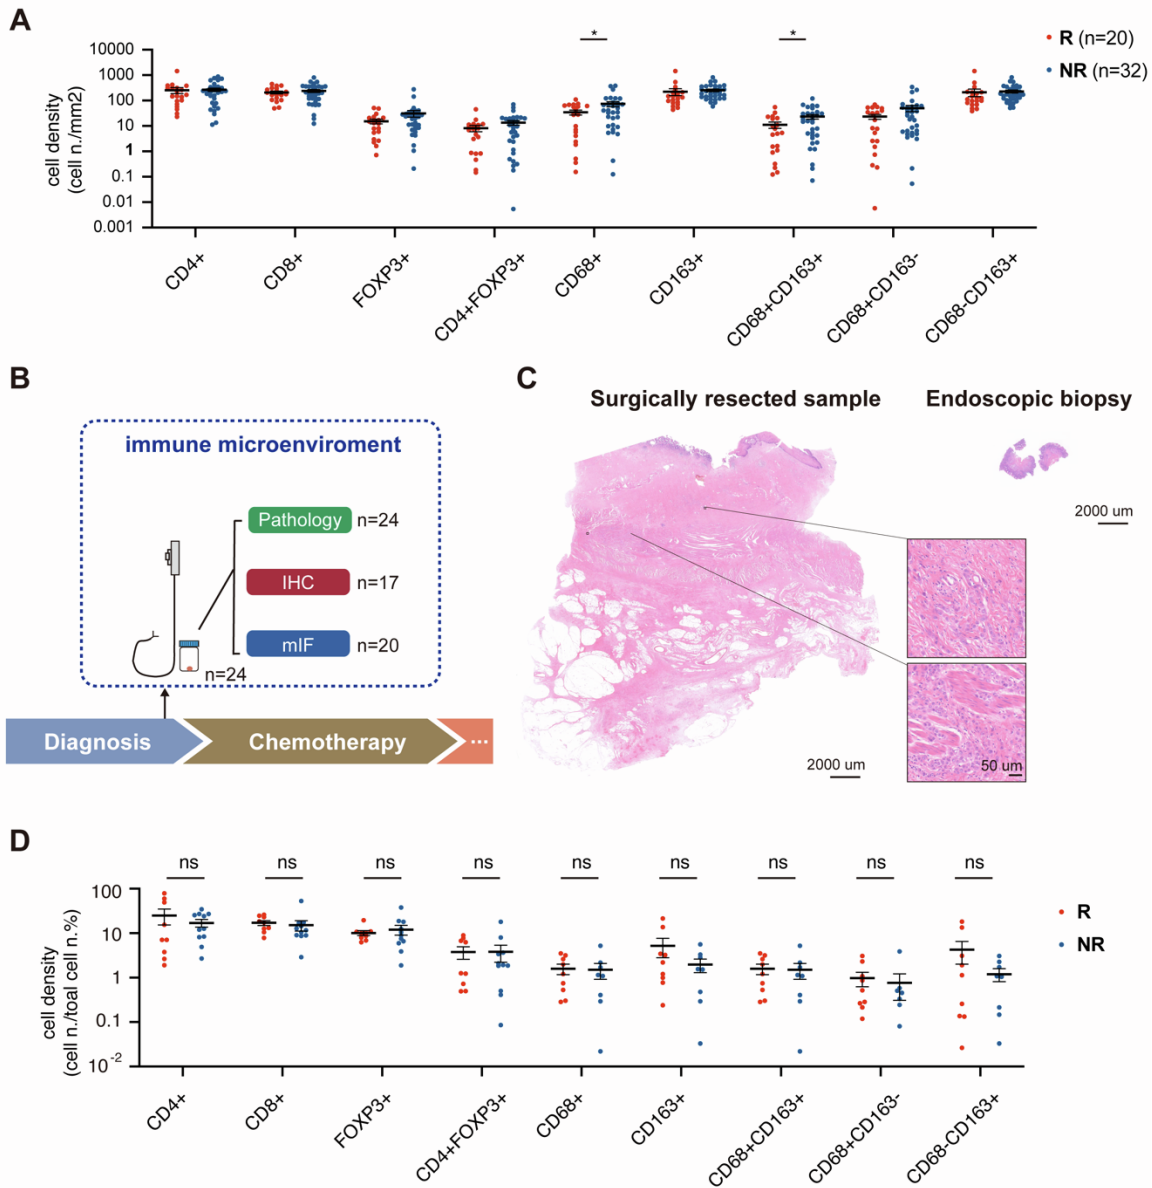

**Figure S2. Pretreatment TME features based on endoscopic biopsy, related to Figure 2.**

(A) Comparison of immune cell infiltration in post-treatment tumor samples in patients with different treatment responses (responder n=20; non-responder n=32). Cell density calculated by positive cell numbers/area(mm<sup>2</sup>). (B) Flow chart of endoscopic biopsy sample collection (C) Representative images of surgically resected samples and endoscopic biopsies. (D) Comparison of immune cell infiltration in pretreatment endoscopic biopsy samples from patients with different treatment responses (responder n=9; non-responder n=11). Cell density calculated by positive cell numbers/total cell numbers.

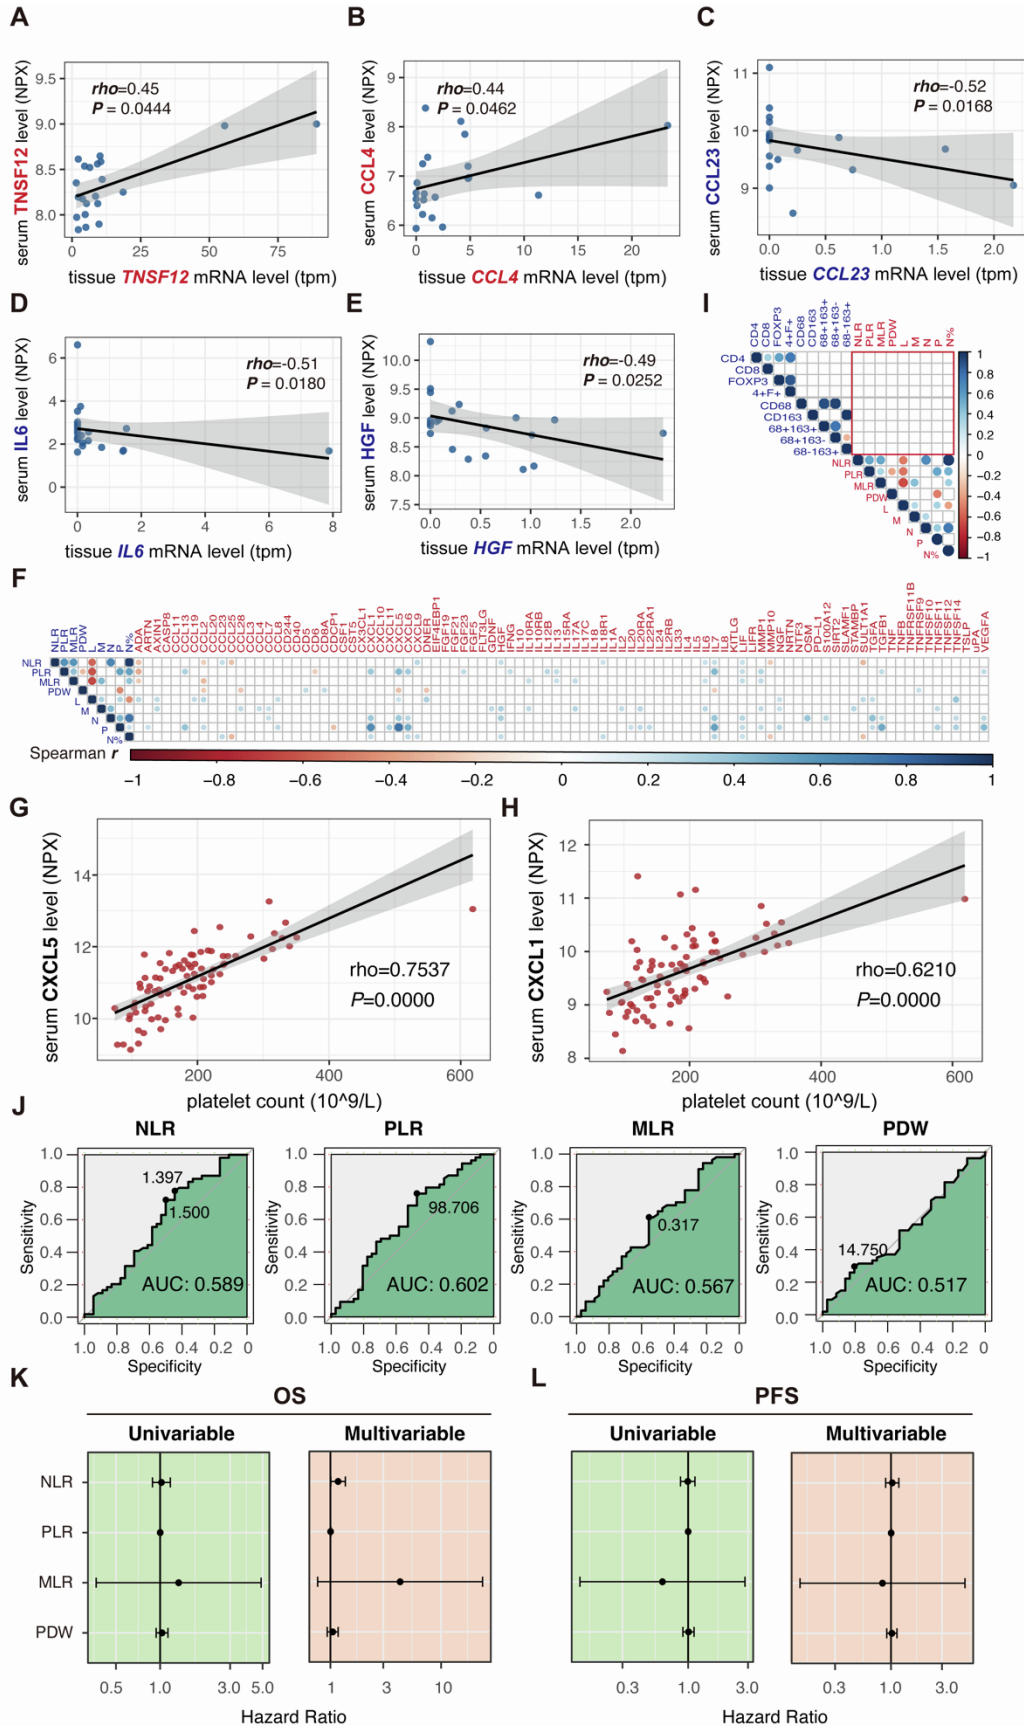

**Figure S3. Correlations between local and systemic immune features and clinical value of classic systemic immune-inflammation indices, related to Figure 3.** (A) Correlation between post-treatment serum TNSF12 level and tissue *TNF12* mRNA level. (B) Correlation between post-treatment serum CCL4 level and tissue *CCL4* mRNA level. (C) Correlation between post-treatment serum CCL23 level and tissue *CCL23* mRNA level. (D) Correlation between post-treatment serum IL6 level and tissue *IL6* mRNA level. (E) Correlation between post-treatment serum HGF level and tissue *HGF* mRNA level. The *rho* values and *p* values of Spearman's correlation were indicated. (F) Correlations between post-treatment serum proteomics and four immune-inflammation indices, and common blood cell counts. *Rho* values of correlations with *p* value<0.05 were indicated by different colors as indicated (G) Correlation between post-treatment serum CXCL5 level and peripheral blood platelet count. (H) Correlation between post-treatment serum CXCL1 level and peripheral blood platelet count. *Rho* and *p* values of Spearman correlation as indicated. (I) Correlations between classic systemic immune-inflammation indices and immune cell infiltration in TME. The *rho* values of correlations with *p* value<0.05 were indicated by different colors as indicated. (J) ROC curve demonstrating treatment response predictive accuracy of four classic systemic immune-inflammation indices. (K) Hazard ratio (HR) of four classic systemic immune-inflammation indices for overall survival (OS) calculated by univariable/multivariable cox regression. (L) Hazard ratio (HR) of four classic systemic immune-inflammation indices for progression-free survival (PFS) calculated by univariable/ multivariable cox regression.

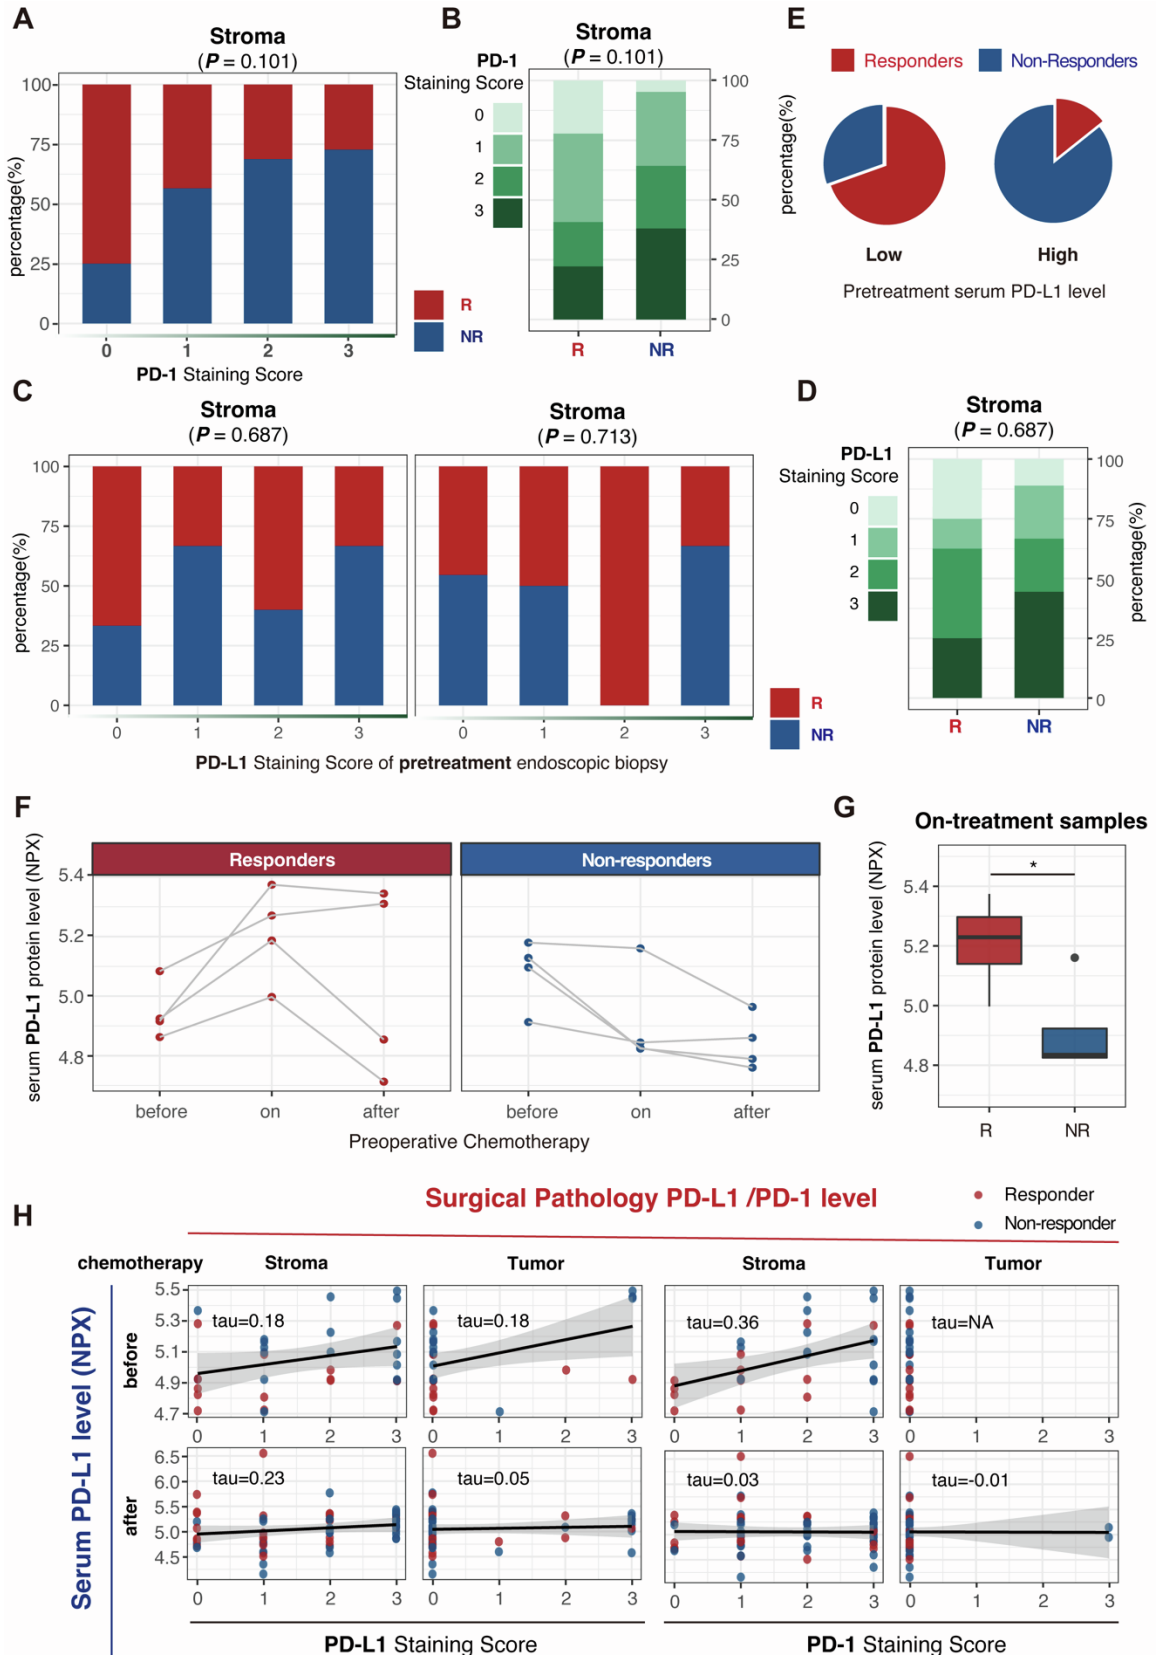

Figure S4. Correlation between tissue PD1/PD-L1 staining and serum PD-L1 level, and their

**associations with treatment response, related to Figure 4.** (A) Treatment response in patients (n=70) with different stromal PD-1 staining scores. (B) Stromal PD-1 staining scores in patients with different treatment response (responders n=33, non-responders n=50). (C) Treatment response in patients (n=17) with different stromal/tumor PD-L1 staining scores of their pretreatment endoscopic biopsies. (D) Pretreatment stromal PD-L1 staining scores of patients with different treatment responses. (E) Treatment responses in patients with high (>5.084 NPX, n=14) and low (<5.084 NPX, n=23) pretreatment serum PD-L1 level. (F) Dynamics of serum PD-L1 level during preoperative chemotherapy. (G) On-treatment serum PD-L1 level differed in patients with different responses. (H) Correlation between surgical pathology PD-L1 /PD-1 level and serum PD-L1 level. *Tau* values of Kendall rank correlation were indicated.

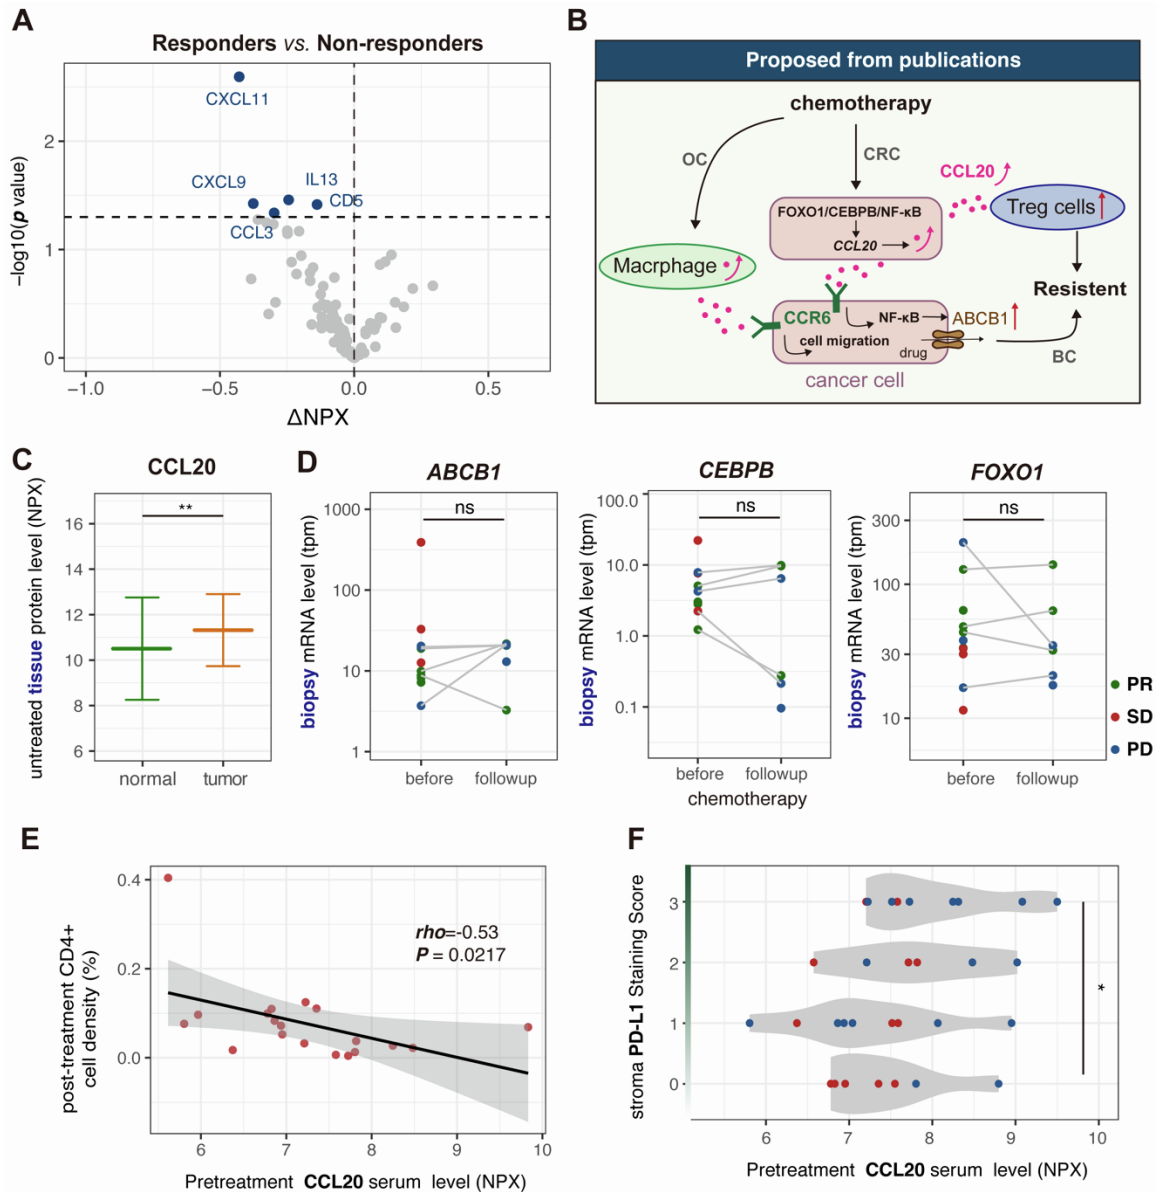

**Figure S5. Potential role of CCL20 in chemoresistance, related to Figure 5.** (A) Comparison of post-treatment serum protein levels in responders and non-responders. (B) Mechanisms of *CCL20* upregulation reported in breast cancer (BC), ovarian cancer (OC), and colorectal cancer (CRC). (C) Gastric tumor had higher *CCL20* protein level compared with normal gastric tissues. (D) Biopsy tumor sample showed no change in *ABCB1*, *CEBPB*, and *FOXO1* mRNA level before and during treatment in patients with gastric cancer undergoing first-line standard chemotherapy. (E) Higher pretreatment *CCL20* level was linked to less CD4(+) T cell infiltration in post-treatment tumors. (F) Higher pretreatment *CCL20* level was linked to higher stromal PD-L1 staining in post-treatment tumors.



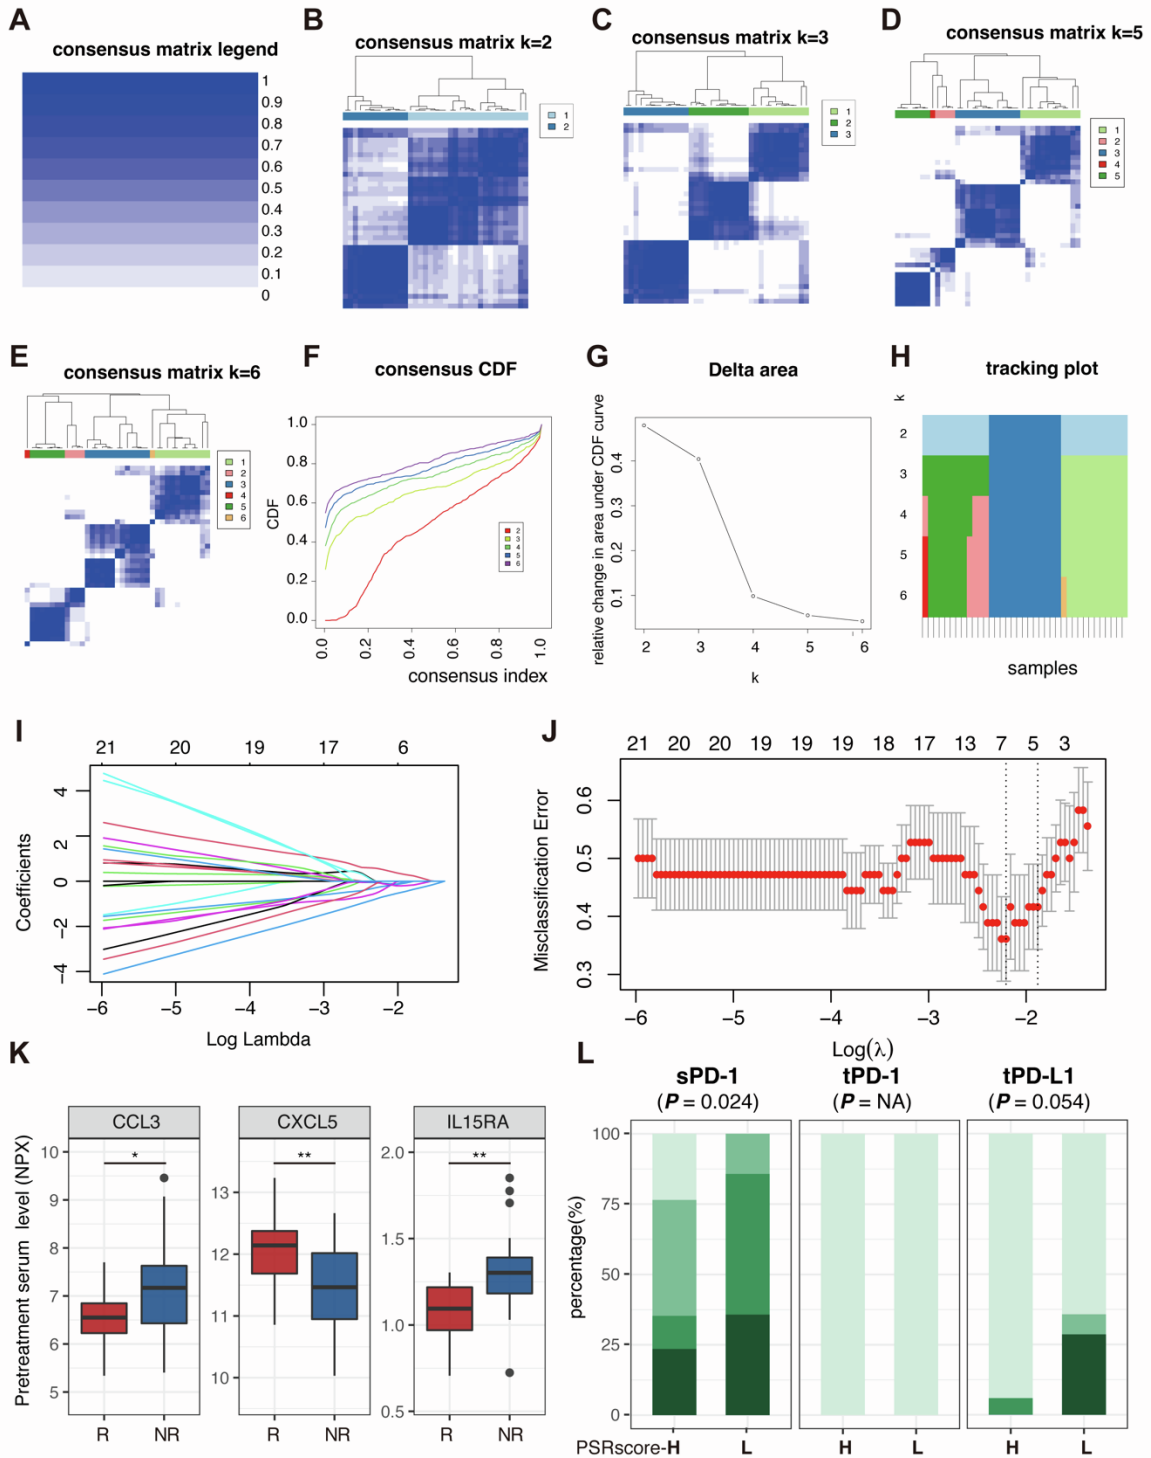

**Figure S6. Unsupervised consensus clustering and LASSO model of pretreatment serum proteomics, related to Figure 6.** (A -E) Consensus matrix heat maps based on the number of clusters (from k=2 to 6). (F) Cumulative distribution function (CDF) under corresponding k values. (G) Relative change in area (delta area) under the cumulative distribution function (CDF) curves when the cluster number varies from k=2 to 6. (H) Sample clustering under different k values. (I) Average error and standard deviation over the folds after

k-fold cross-validation in LASSO model. (J) Misclassification error in different  $\lambda$  value. A  $\lambda$  value= 0.16 with  $\log(\lambda) = -1.834$  was chosen by cross-validation via the 1-SE criteria. (K) Responders (n=18) had lower serum CCL3 and IL15RA level and higher CXCL5 level before chemotherapy compared with non-responders (n=19). (L) Post-treatment stromal PD-1 level and tumor PD-1/PD-L1 level in patients with high/low PSRscores (H: n=18, L: n=14).

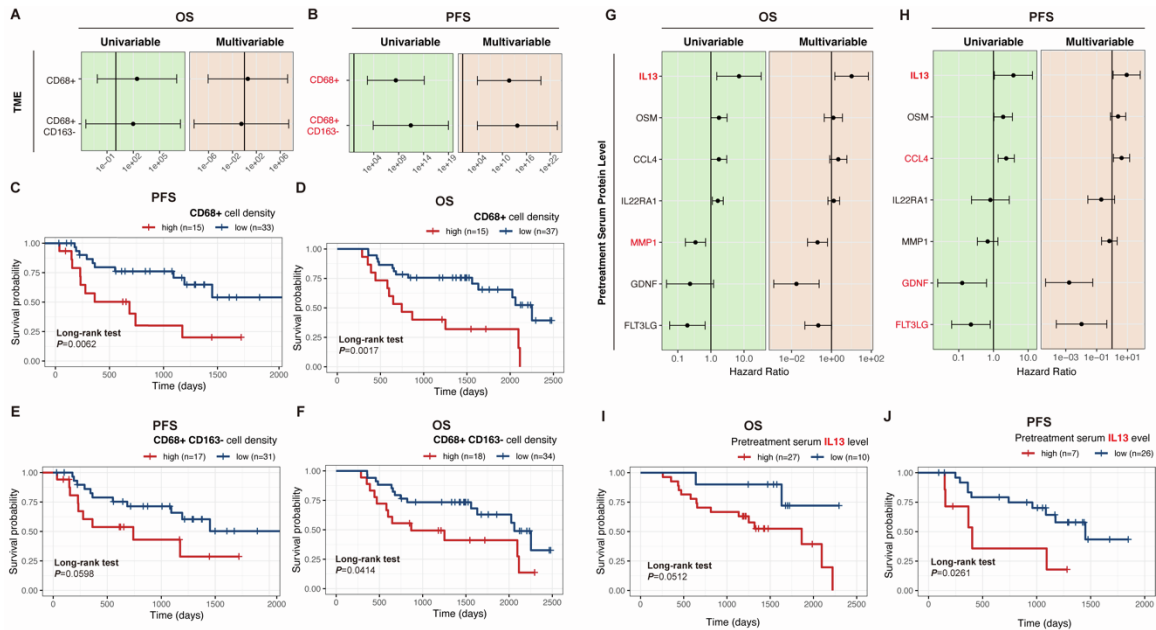

**Figure S7. Prognostic value of immune cell infiltration in TME and pretreatment serum proteomics, related to Figure 7.** (A) Hazard ratios (HR) of different immune cell infiltration in TME for overall survival calculated by univariable/ multivariable cox regression. (B) HR of different immune cell infiltration in TME for progression-free survival calculated by univariable/ multivariable cox regression. The length of the horizontal line represented the 95% confidence interval of HR for each protein. The vertical solid line represented HR= 1. (C) Kaplan–Meier curves of PFS for patients with high (n=15) and low (n=33) CD68(+) cell infiltration. (D) Kaplan–Meier curves of OS for patients with high (n=15) and low (n=37) CD68(+) cell infiltration. (E) Kaplan–Meier curves of PFS for patients with high (n=17) and low (n=31) CD68(+) and CD163(-) cell infiltration. (F) Kaplan–Meier curves of OS for patients with high (n=18) and low (n=34) CD68(+) and CD163(-) cell infiltration. The *p* value of Log-rank test and HR of multivariable cox regression were indicated. (G) Hazard ratios (HR) of pretreatment serum protein levels for overall survival calculated by univariable/ multivariable cox regression. (H) HR of post-treatment serum protein levels for progression-free survival calculated by univariable/ multivariable cox regression. The length of the horizontal line represented the 95% confidence interval of HR for each protein. The vertical solid line represented HR= 1. (I) Kaplan–Meier curves of overall survival (OS) for patients with high (n=27) and low (n=10) post-treatment serum IL13 level. (J) Kaplan–Meier curves of progression-free survival (PFS) for patients with high (n=7) and low (n=26) post-treatment serum IL13 level. The *p* value of Log-rank test and HR of multivariable cox regression were indicated.

**Tables**

**Table S1. Clinical characteristics of patients, related to Figure 7.**

| <b>Response</b>        | <b>Good</b> | <b>Poor</b> | <b>Total</b> | <b>P value</b> |
|------------------------|-------------|-------------|--------------|----------------|
| N                      | 36          | 54          | 90           |                |
| gender = M (%)         | 26 (72.2)   | 42 (77.8)   | 68 (75.6)    | 0.726          |
| age = >=60 (%)         | 19 (52.8)   | 32 (59.3)   | 51 (56.7)    | 0.696          |
| location = non-AEJ (%) | 31 (86.1)   | 39 (72.2)   | 70 (77.8)    | 0.196          |
| Lauren (%)             |             |             |              | 0.846          |
| diffuse                | 9 (25.0)    | 14 (25.9)   | 23 (25.6)    |                |
| Intestinal             | 15 (41.7)   | 25 (46.3)   | 40 (44.4)    |                |
| mixed                  | 12 (33.3)   | 15 (27.8)   | 27 (30.0)    |                |
| differentiation (%)    |             |             |              | 0.083          |
| G2                     | 11 (30.6)   | 8 (14.8)    | 19 (21.1)    |                |
| G3                     | 24 (66.7)   | 46 (85.2)   | 70 (77.8)    |                |
| Gx                     | 1 (2.8)     | 0 (0.0)     | 1 (1.1)      |                |
| regimens (%)           |             |             |              | 0.167          |
| Two-drug               | 14 (38.9)   | 29 (53.7)   | 43 (47.8)    |                |
| Three-drug             | 21 (58.3)   | 21 (38.9)   | 42 (46.7)    |                |
| Other                  | 1 (2.8)     | 4 (7.4)     | 5 (5.6)      |                |
| ypT (%)                |             |             |              | 0.312          |
| 1a                     | 2 (5.6)     | 1 (1.9)     | 3 (3.3)      |                |
| 1b                     | 3 (8.3)     | 1 (1.9)     | 4 (4.4)      |                |
| 2                      | 10 (27.8)   | 12 (22.2)   | 22 (24.4)    |                |
| 3                      | 11 (30.6)   | 20 (37.0)   | 31 (34.4)    |                |
| 4a                     | 9 (25.0)    | 20 (37.0)   | 29 (32.2)    |                |
| X                      | 1 (2.8)     | 0 (0.0)     | 1 (1.1)      |                |
| ypN (%)                |             |             |              | <0.001         |
| 0                      | 19 (52.8)   | 8 (14.8)    | 27 (30.0)    |                |
| 1                      | 11 (30.6)   | 10 (18.5)   | 21 (23.3)    |                |
| 2                      | 0 (0.0)     | 15 (27.8)   | 15 (16.7)    |                |
| 3a                     | 6 (16.7)    | 9 (16.7)    | 15 (16.7)    |                |
| 3b                     | 0 (0.0)     | 12 (22.2)   | 12 (13.3)    |                |
| ypM = 1 (%)            | 13 (36.1)   | 13 (24.1)   | 26 (28.9)    | 0.319          |
| ypTNM (%)              |             |             |              | 0.021          |
| I                      | 9 (25.0)    | 5 (9.3)     | 14 (15.6)    |                |
| II                     | 7 (19.4)    | 11 (20.4)   | 18 (20.0)    |                |
| III                    | 6 (16.7)    | 25 (46.3)   | 31 (34.4)    |                |
| IV                     | 13 (36.1)   | 13 (24.1)   | 26 (28.9)    |                |
| Other                  | 1 (2.8)     | 0 (0.0)     | 1 (1.1)      |                |
| LVI = Positive (%)     | 10 (27.8)   | 31 (57.4)   | 41 (45.6)    | 0.011          |

|                    |           |           |           |       |
|--------------------|-----------|-----------|-----------|-------|
| PNI = Positive (%) | 18 (50.0) | 35 (64.8) | 53 (58.9) | 0.238 |
|--------------------|-----------|-----------|-----------|-------|

---

**Table S2. Multivariate survival analysis of serum post-treatment IL10RB level based on OS, related to Figure 7.**

| Characteristics   | univariable cox regression |         | multivariable cox regression |          |
|-------------------|----------------------------|---------|------------------------------|----------|
|                   | Hazard ratio (95% CI)      | P value | Hazard ratio (95% CI)        | P value  |
| gender = M        | 0.7146 (0.3791, 1.347)     | 0.299   | 1.407 (0.5225, 3.769)        | 0.497    |
| age = >=60        | 0.704 (0.3885, 1.276)      | 0.247   | 0.5613 (0.2468, 1.277)       | 0.168    |
| location= non-AEJ | 1.671 (0.7454, 3.745)      | 0.213   |                              |          |
| Lauren            |                            |         |                              |          |
| diffuse           | reference                  |         | Reference                    |          |
| Intestinal        | 0.3014 (0.1458, 0.6232)    | 0.001   | ** 0.4279 (0.1498, 1.222)    | 0.113    |
| mixed             | 0.5435 (0.2708, 1.0909)    | 0.086   | . 0.6309 (0.2337, 1.703)     | 0.363    |
| differentiation   |                            |         |                              |          |
| G2                | reference                  |         | Reference                    |          |
| G3                | 4.438 (1.3675, 14.4)       | 0.013   | * 1.54 (0.3791, 6.259)       | 0.546    |
| Gx                | 6.936 (0.7154, 67.24)      | 0.095   | . 1.385 (0.1084, 17.697)     | 0.802    |
| regimens (%)      |                            |         |                              |          |
| Other             | reference                  |         |                              |          |
| Two-drug          | 1.232 (0.3591, 4.227)      | 0.740   |                              |          |
| Three-drug        | 1.536 (0.4475, 5.272)      | 0.495   |                              |          |
| ypTNM             |                            |         |                              |          |
| I                 | reference                  |         | Reference                    |          |
| II                | 2.522 (0.5074, 12.54)      | 0.258   | 3.053 (0.3335, 27.95)        | 0.323    |
| III               | 6.08 (1.4182, 26.07)       | 0.015   | * 5.332 (0.6065, 46.873)     | 0.131    |
| IV                | 6.259 (1.4427, 27.15)      | 0.014   | * 10.08 (1.2552, 80.883)     | 0.030 *  |
| Other             | 0 (0, Inf)                 | 0.997   | 0 (0, Inf)                   | 0.998    |
| LVI = Positive    | 2.867 (1.524, 5.391)       | 0.001   | ** 1.996 (0.9191, 4.334)     | 0.081 .  |
| PNI = Positive    | 2.033 (1.062, 3.892)       | 0.032   | * 1.431 (0.6281, 3.262)      | 0.393    |
| IL10RB level      | 3.086 (1.055, 9.031)       | 0.040   | * 5.622 (1.7884, 17.676)     | 0.003 ** |

**Table S3. Multivariable cox regression of post-treatment serum IL10RB level based on PFS, related to Figure 7.**

| Characteristics   | univariable cox regression |         | multivariable cox regression |         |     |
|-------------------|----------------------------|---------|------------------------------|---------|-----|
|                   | Hazard ratio (95% CI)      | P value | Hazard ratio (95% CI)        | P value |     |
| gender = M        | 0.8883 (0.4025, 1.961)     | 0.769   | 1.109 (0.3878,3.173)         | 0.846   |     |
| age = >=60        | 0.7027 (0.3619,1.364)      | 0.297   | 0.491 (0.2101,1.147)         | 0.100   |     |
| location= non-AEJ | 1.507 (0.5844,3.884)       | 0.396   |                              |         |     |
| Lauren            |                            |         |                              |         |     |
| diffuse           | reference                  |         | reference                    |         |     |
| Intestinal        | 0.3920 (0.1725,0.8907)     | 0.0253  | * 0.8374 (0.2711,2.587)      | 0.758   |     |
| mixed             | 0.8524 (0.3821,1.9015)     | 0.6964  | 1.484 (0.4185,5.261)         | 0.541   |     |
| differentiation   |                            |         |                              |         |     |
| G2                | reference                  |         |                              |         |     |
| G3                | 2.2569 (0.8714,5.846)      | 0.0937  |                              |         |     |
| Gx                | 3.104 (0.3609,26.693)      | 0.3022  |                              |         |     |
| regimens (%)      |                            |         |                              |         |     |
| other             | reference                  |         |                              |         |     |
| Two-drug          | 1.483 (0.1980,11.1)        | 0.701   |                              |         |     |
| Three-drug        | 1.369 (0.1803,10.39)       | 0.761   |                              |         |     |
| ypTNM             |                            |         |                              |         |     |
| I                 | reference                  |         | reference                    |         |     |
| II                | 1.290 (0.3634,4.581)       | 0.693   | 1.702 (0.3868,7.489)         | 0.482   |     |
| III               | 2.402 (0.7942,7.267)       | 0.121   | 3.566 (0.7414,17.152)        | 0.113   |     |
| IV                | 2.211 (0.6925,7.06)        | 0.180   | 4.816 (1.1227,20.654)        | 0.034   | *   |
| other             | 0 (0,Inf)                  | 0.997   | 0 (0,Inf)                    | 0.997   |     |
| LVI = Positive    | 1.978 (1.008 ,3.884)       | 0.0474  | * 1.529 (0.61,3.832)         | 0.365   |     |
| PNI = Positive    | 2.782 (1.262,6.135)        | 0.0112  | * 3.464 (1.2484,9.61)        | 0.017   | *   |
| IL10RB level      | 4.3918 (1.185,16.27)       | 0.0268  | * 14.35 (3.0624,67.216)      | 0.001   | *** |

**Table S4. Proteins included in Olink proteomics Target 96 inflammation panel, related to serum immune proteomics in STAR Methods.**

| <b>UniprotID</b> | <b>Protein name</b>                                                              | <b>abbreviation</b> |
|------------------|----------------------------------------------------------------------------------|---------------------|
| O00300           | Osteoprotegerin (OPG)                                                            | TNFRSF1<br>1B       |
| O14625           | C-X-C motif chemokine 11 (CXCL11)                                                | CXCL11              |
| O14788           | TNF-related activation-induced cytokine (TRANCE)                                 | TNFSF11             |
| O15169           | Axin-1 (AXIN1)                                                                   | AXIN1               |
| O15444           | C-C motif chemokine 25 (CCL25)                                                   | CCL25               |
| O43508           | Tumor necrosis factor (Ligand) superfamily, member 12 (TWEAK)                    | TNFSF12             |
| O43557           | Tumor necrosis factor ligand superfamily member 14 (TNFSF14)                     | TNFSF14             |
| O95630           | STAM-binding protein (STAMPB)                                                    | STAMPB              |
| O95750           | Fibroblast growth factor 19 (FGF-19)                                             | FGF19               |
| O95760           | Interleukin-33 (IL-33)                                                           | IL33                |
| P00749           | Urokinase-type plasminogen activator (uPA)                                       | uPA                 |
| P00813           | Adenosine Deaminase (ADA)                                                        | ADA                 |
| P01135           | Transforming growth factor alpha (TGF-alpha)                                     | TGFA                |
| P01137           | Latency-associated peptide transforming growth factor beta-1 (LAP<br>TGF-beta-1) | TGFB1               |
| P01138           | Beta-nerve growth factor (Beta-NGF)                                              | NGF                 |
| P01374           | TNF-beta (TNFB)                                                                  | TNFB                |
| P01375           | Tumor necrosis factor (TNF)                                                      | TNF                 |
| P01579           | Interferon gamma (IFN-gamma)                                                     | IFNG                |
| P01583           | Interleukin-1 alpha (IL-1 alpha)                                                 | IL1A                |
| P01732           | T-cell surface glycoprotein CD8 alpha chain (CD8A)                               | CD8A                |
| P02778           | C-X-C motif chemokine 10 (CXCL10)                                                | CXCL10              |
| P03956           | Matrix metalloproteinase-1 (MMP-1)                                               | MMP1                |
| P05112           | Interleukin-4 (IL-4)                                                             | IL4                 |
| P05113           | Interleukin-5 (IL5)                                                              | IL5                 |
| P05231           | Interleukin-6 (IL6)                                                              | IL6                 |
| P06127           | T-cell surface glycoprotein CD5 (CD5)                                            | CD5                 |
| P09238           | Matrix metalloproteinase-10 (MMP-10)                                             | MMP10               |
| P09341           | C-X-C motif chemokine 1 (CXCL1)                                                  | CXCL1               |
| P09603           | Macrophage colony-stimulating factor 1 (CSF-1)                                   | CSF1                |
| P10145           | Interleukin-8 (IL-8)                                                             | IL8                 |
| P10147           | C-C motif chemokine 3 (CCL3)                                                     | CCL3                |
| P12034           | Fibroblast growth factor 5 (FGF-5)                                               | FGF5                |
| P13232           | Interleukin-7 (IL-7)                                                             | IL7                 |
| P13236           | C-C motif chemokine 4 (CCL4)                                                     | CCL4                |
| P13500           | Monocyte chemoattractant protein 1 (MCP-1)                                       | CCL2                |
| P13725           | Oncostatin-M (OSM)                                                               | OSM                 |
| P14210           | Hepatocyte growth factor (HGF)                                                   | HGF                 |
| P14784           | Interleukin-2 receptor subunit beta (IL-2RB)                                     | IL2RB               |



|        |                                                                        |          |
|--------|------------------------------------------------------------------------|----------|
| P15018 | Leukemia inhibitory factor (LIF)                                       | LIF      |
| P15692 | Vascular endothelial growth factor A (VEGF-A)                          | VEGFA    |
| P20783 | Neurotrophin-3 (NT-3)                                                  | NTF3     |
| P21583 | Stem cell factor (SCF)                                                 | KITLG    |
| P22301 | Interleukin-10 (IL10)                                                  | IL10     |
| P25942 | CD40L receptor (CD40)                                                  | CD40     |
| P28325 | Cystatin D (CST5)                                                      | CST5     |
| P29460 | Interleukin-12 subunit beta (IL-12B)                                   | IL12B    |
| P30203 | T cell surface glycoprotein CD6 isoform (CD6)                          | CD6      |
| P35225 | Interleukin-13 (IL-13)                                                 | IL13     |
| P39905 | Glial cell line-derived neurotrophic factor (GDNF)                     | GDNF     |
| P42702 | Leukemia inhibitory factor receptor (LIF-R)                            | LIFR     |
| P42830 | C-X-C motif chemokine 5 (CXCL5)                                        | CXCL5    |
| P49771 | Fms-related tyrosine kinase 3 ligand (Flt3L)                           | FLT3LG   |
| P50225 | Sulfotransferase 1A1 (ST1A1)                                           | SULT1A1  |
| P50591 | TNF-related apoptosis-inducing ligand (TRAIL)                          | TNFSF10  |
| P51671 | Eotaxin (CCL11)                                                        | CCL11    |
| P55773 | C-C motif chemokine 23 (CCL23)                                         | CCL23    |
| P60568 | Interleukin-2 (IL-2)                                                   | IL2      |
| P78423 | Fractalkine (CX3CL1)                                                   | CX3CL1   |
| P78556 | C-C motif chemokine 20 (CCL20)                                         | CCL20    |
| P80075 | Monocyte chemotactic protein 2 (MCP-2)                                 | CCL8     |
| P80098 | Monocyte chemotactic protein 3 (MCP-3)                                 | CCL7     |
| P80162 | C-X-C motif chemokine 6 (CXCL6)                                        | CXCL6    |
| P80511 | Protein S100-A12 (EN-RAGE)                                             | S100A12  |
| Q07011 | Tumor necrosis factor receptor superfamily member 9 (TNFRSF9)          | TNFRSF9  |
| Q07325 | C-X-C motif chemokine 9 (CXCL9)                                        | CXCL9    |
| Q08334 | Interleukin-10 receptor subunit beta (IL-10RB)                         | IL10RB   |
| Q13007 | Interleukin-24 (IL-24)                                                 | IL24     |
| Q13261 | Interleukin-15 receptor subunit alpha (IL-15RA)                        | IL15RA   |
| Q13291 | Signaling lymphocytic activation molecule (SLAMF1)                     | SLAMF1   |
| Q13478 | Interleukin-18 receptor 1 (IL-18R1)                                    | IL18R1   |
| Q13541 | Eukaryotic translation initiation factor 4E-binding protein 1 (4E-BP1) | EIF4EBP1 |
| Q13651 | Interleukin-10 receptor subunit alpha (IL-10RA)                        | IL10RA   |
| Q14116 | Interleukin-18 (IL-18)                                                 | IL18     |
| Q14790 | Caspase-8 (CASP-8)                                                     | CASP8    |
| Q16552 | Interleukin-17A (IL-17A)                                               | IL17A    |
| Q5T4W7 | Artemin (ARTN)                                                         | ARTN     |
| Q8IXJ6 | SIR2-like protein 2 (SIRT2)                                            | SIRT2    |
| Q8N6P7 | Interleukin-22 receptor subunit alpha-1 (IL-22 RA1)                    | IL22RA1  |
| Q8NFT8 | Delta and Notch-like epidermal growth factor-related receptor (DNER)   | DNER     |

|        |                                                 |        |
|--------|-------------------------------------------------|--------|
| Q969D9 | Thymic stromal lymphopoietin (TSLP)             | TSLP   |
| Q99616 | Monocyte chemoattractant protein 4 (MCP-4)      | CCL13  |
| Q99731 | C-C motif chemokine 19 (CCL19)                  | CCL19  |
| Q99748 | Neurturin (NRTN)                                | NRTN   |
| Q9BZW8 | Natural killer cell receptor 2B4 (CD244)        | CD244  |
| Q9GZV9 | Fibroblast growth factor 23 (FGF-23)            | FGF23  |
| Q9H5V8 | CUB domain-containing protein 1 (CDCP1)         | CDCP1  |
| Q9NRJ3 | C-C motif chemokine 28 (CCL28)                  | CCL28  |
| Q9NSA1 | Fibroblast growth factor 21 (FGF-21)            | FGF21  |
| Q9NYY1 | Interleukin-20 (IL-20)                          | IL20   |
| Q9NZQ7 | Programmed cell death 1 ligand 1 (PD-L1)        | PD-L1  |
| Q9P0M4 | Interleukin-17C (IL-17C)                        | IL17C  |
| Q9UHF4 | Interleukin-20 receptor subunit alpha (IL-20RA) | IL20RA |

---
